# Supplementary material for: High-Salt Diet Induces Depletion of Lactic Acid-Producing Bacteria in Murine Gut
Source: MDPI journal article supplement (doi:10.3390/nu14061171), 2022-03-10
Supplement: s1 [file s1]

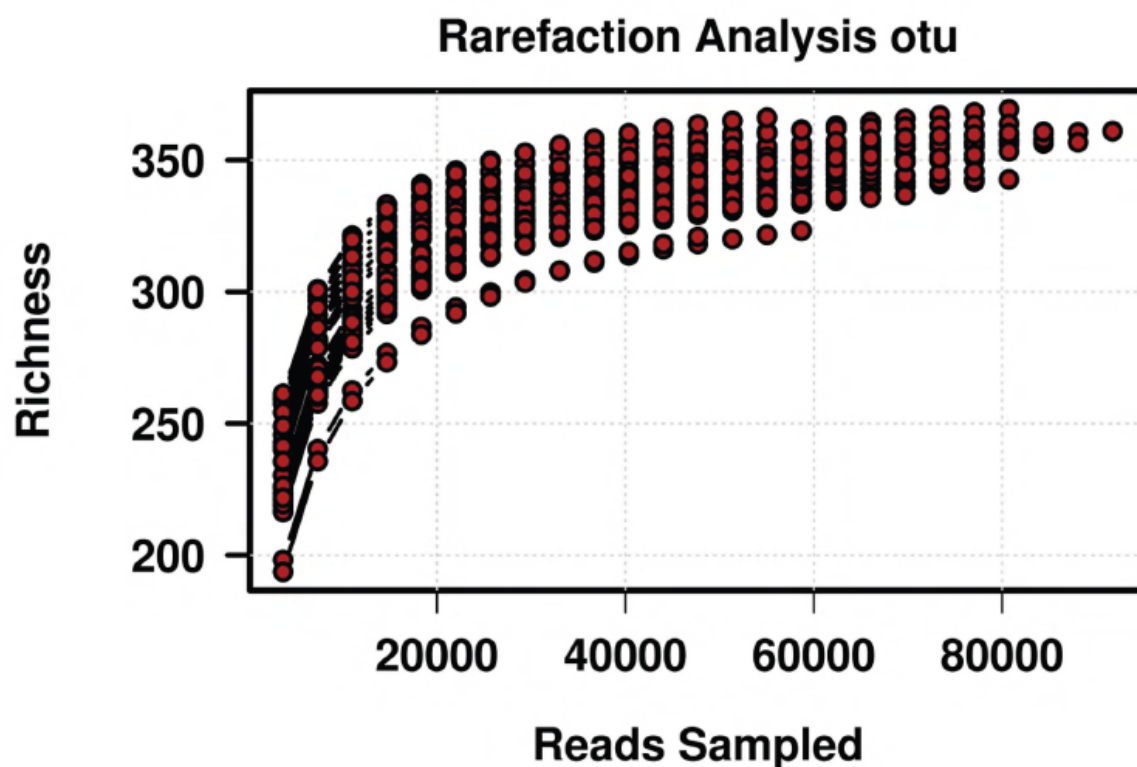

**Figure S1.** Rarefaction curves indicating the observed number of operational taxonomic units (OTUs) within a sample. Rarefaction curves of OTUs clustered and saturated at different levels across exposure groups and indicate the intra-sample diversity.

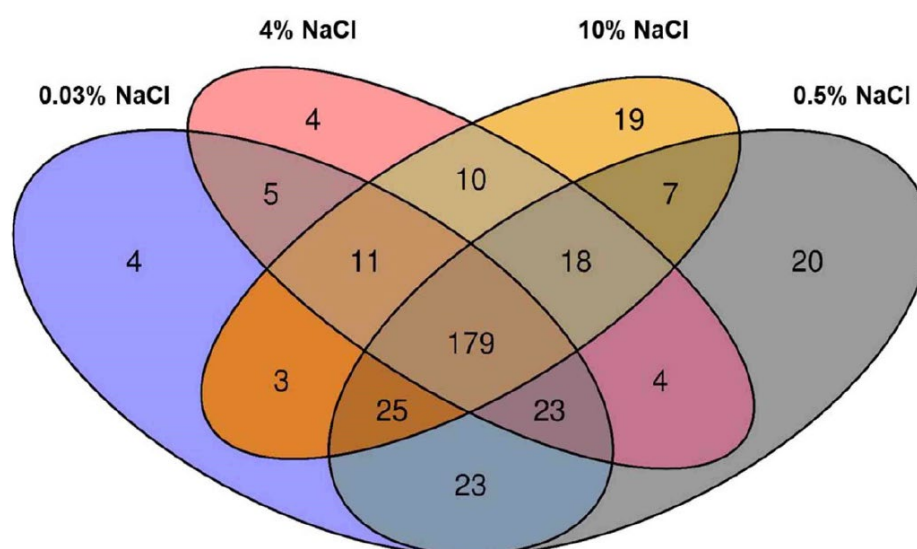

| Bacterial OTUs                                                   | Type   | Food content |
|------------------------------------------------------------------|--------|--------------|
| p Firmicutes g Blautia otu282                                    | unique | 0.03% NaCl   |
| p Firmicutes f Lachnospiraceae otu314                            | unique | 0.03% NaCl   |
| p Firmicutes f Lachnospiraceae otu274                            | unique | 0.03% NaCl   |
| p Actinobacteriota g Bifidobacterium otu183                      | unique | 0.03% NaCl   |
| p Firmicutes g uncultured s unidentified otu395                  | unique | 0.5% NaCl    |
| p Firmicutes g uncultured s unidentified otu260                  | unique | 0.5% NaCl    |
| p Firmicutes g uncultured s Clostridiales bacterium otu298       | unique | 0.5% NaCl    |
| p Firmicutes g Oscillibacter s Clostridium leptum otu766         | unique | 0.5% NaCl    |
| p Firmicutes g Oscillibacter s Clostridiales bacterium otu247    | unique | 0.5% NaCl    |
| p Firmicutes g Clostridia UCG014 otu71                           | unique | 0.5% NaCl    |
| p Firmicutes g Blautia otu495                                    | unique | 0.5% NaCl    |
| p Firmicutes g Blautia otu479                                    | unique | 0.5% NaCl    |
| p Firmicutes g Anaeroplasma s uncultured Anaeroplasma otu369     | unique | 0.5% NaCl    |
| p Firmicutes g Acetatifactor s Acetatifactor muris otu649        | unique | 0.5% NaCl    |
| p Firmicutes f Peptostreptococcaceae otu663                      | unique | 0.5% NaCl    |
| p Firmicutes f Lachnospiraceae otu598                            | unique | 0.5% NaCl    |
| p Firmicutes f Lachnospiraceae otu370                            | unique | 0.5% NaCl    |
| p Firmicutes f Lachnospiraceae otu354                            | unique | 0.5% NaCl    |
| p Firmicutes f Lachnospiraceae otu336                            | unique | 0.5% NaCl    |
| p Firmicutes f Lachnospiraceae otu276                            | unique | 0.5% NaCl    |
| p Firmicutes f Lachnospiraceae otu272                            | unique | 0.5% NaCl    |
| p Firmicutes f Lachnospiraceae otu193                            | unique | 0.5% NaCl    |
| p Bacteroidota g Muribaculaceae s uncultured bacterium otu208    | unique | 0.5% NaCl    |
| p Actinobacteriota g Bifidobacterium otu340                      | unique | 0.5% NaCl    |
| p Firmicutes g Clostridia UCG014 s uncultured Escherichia otu236 | unique | 4% NaCl      |
| p Firmicutes g Blautia s uncultured Clostridiales otu600         | unique | 4% NaCl      |
| p Firmicutes g Blautia s uncultured Clostridiales otu580         | unique | 4% NaCl      |
| p Firmicutes g Blautia s uncultured Clostridiales otu519         | unique | 4% NaCl      |
| p Proteobacteria o Enterobacterales otu92                        | unique | 10% NaCl     |
| p Proteobacteria o Enterobacterales otu62                        | unique | 10% NaCl     |
| p Proteobacteria o Enterobacterales otu301                       | unique | 10% NaCl     |
| p Firmicutes g uncultured s unidentified otu261                  | unique | 10% NaCl     |
| p Firmicutes g Roseburia otu248                                  | unique | 10% NaCl     |
| p Firmicutes g Roseburia otu245                                  | unique | 10% NaCl     |
| p Firmicutes g Lachnospiraceae UCG006 s Clostridium sp. otu325   | unique | 10% NaCl     |
| p Firmicutes g Lachnospiraceae otu306                            | unique | 10% NaCl     |
| p Firmicutes g Incertae Sedis otu321                             | unique | 10% NaCl     |
| p Firmicutes g Colidextribacter otu400                           | unique | 10% NaCl     |
| p Firmicutes g Clostridia UCG014 s uncultured Escherichia otu161 | unique | 10% NaCl     |
| p Firmicutes g Acetatifactor s Acetatifactor muris otu293        | unique | 10% NaCl     |
| p Firmicutes f Oscillospiraceae otu327                           | unique | 10% NaCl     |
| p Firmicutes f Oscillospiraceae otu317                           | unique | 10% NaCl     |
| p Firmicutes f Oscillospiraceae otu308                           | unique | 10% NaCl     |
| p Firmicutes f Oscillospiraceae otu228                           | unique | 10% NaCl     |
| p Firmicutes f Lachnospiraceae otu407                            | unique | 10% NaCl     |
| p Bacteroidota g Muribaculum s Muribaculum intestinale otu200    | unique | 10% NaCl     |
| p Bacteroidota g Muribaculaceae s uncultured bacterium otu190    | unique | 10% NaCl     |

**Figure S2.** A Venn diagram depicting the shared and unique bacterial OTUs of the gut microbiome among mice fed on sodium-deficient 0.03% NaCl, 0.5% NaCl (control), high salt 4% NaCl (HSD) and high salt 10% NaCl (HSD).

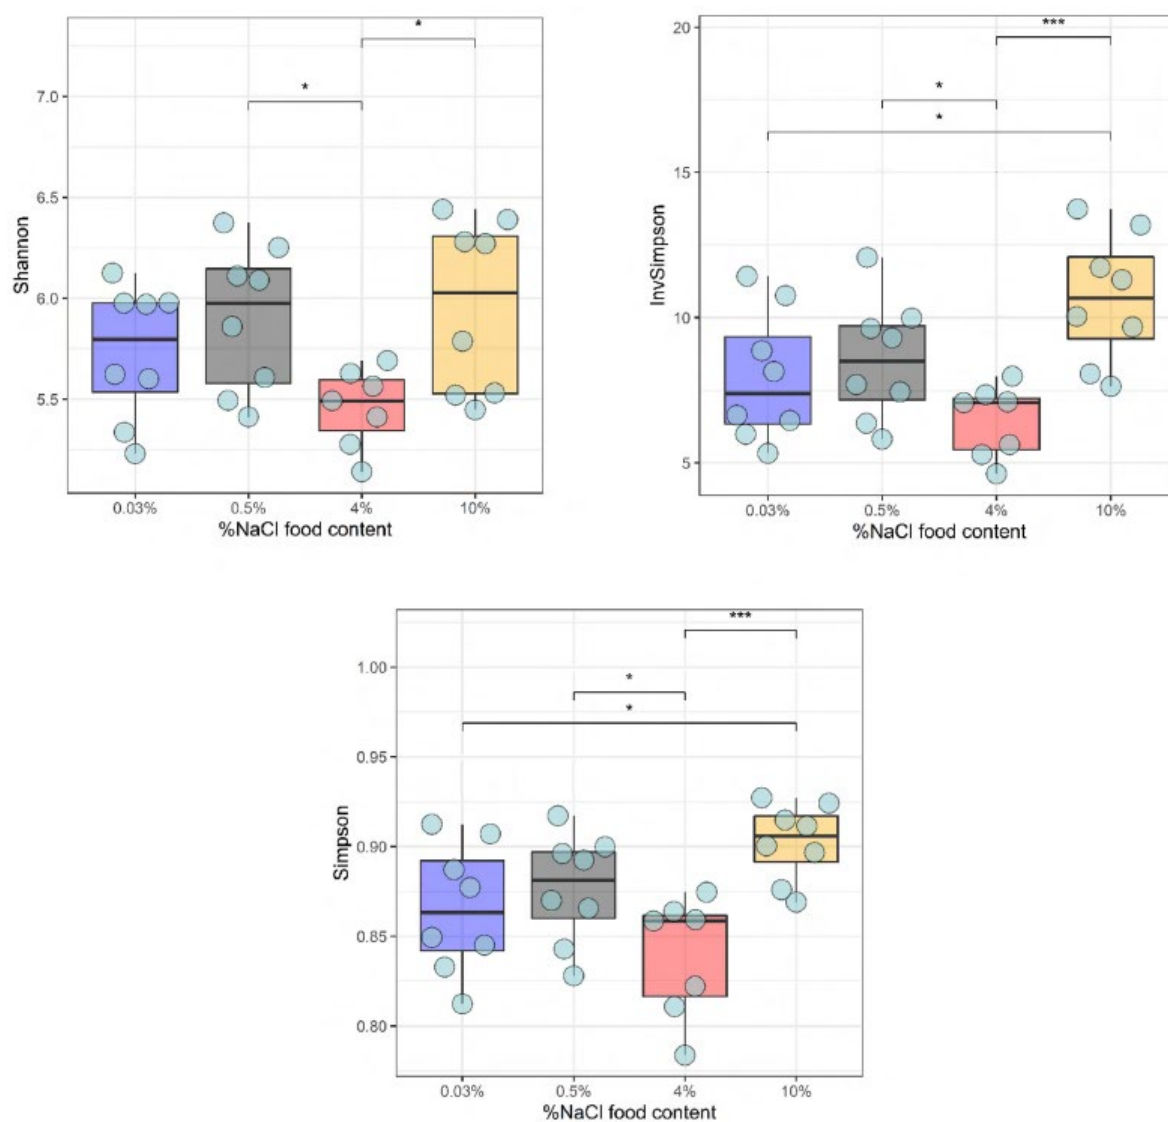

**Figure S3.** Alpha diversity analysis of fecal microbiota, a boxplot depicting the Shannon diversity, InvSimpson and Simpson's diversity index, which is a measure for the diversity of the gut microbiome. \*  $p \leq 0.05$ ; \*\*, \*\*\*  $p \leq 0.001$ .

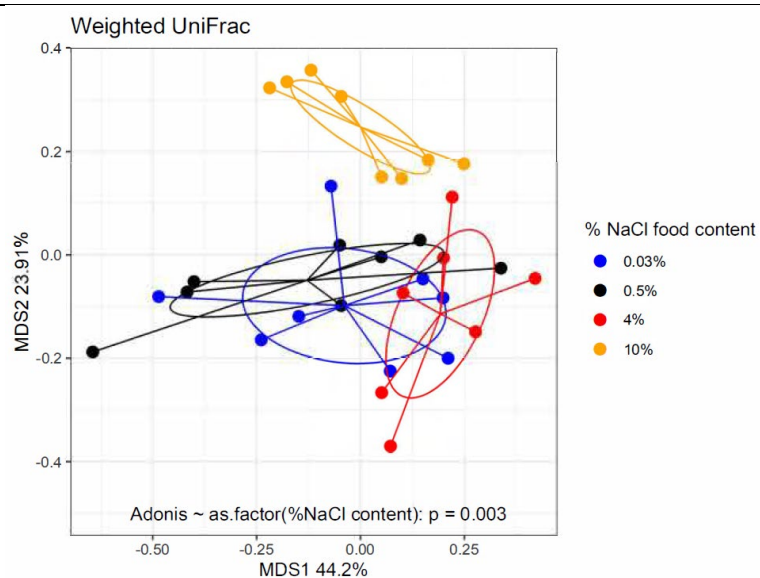

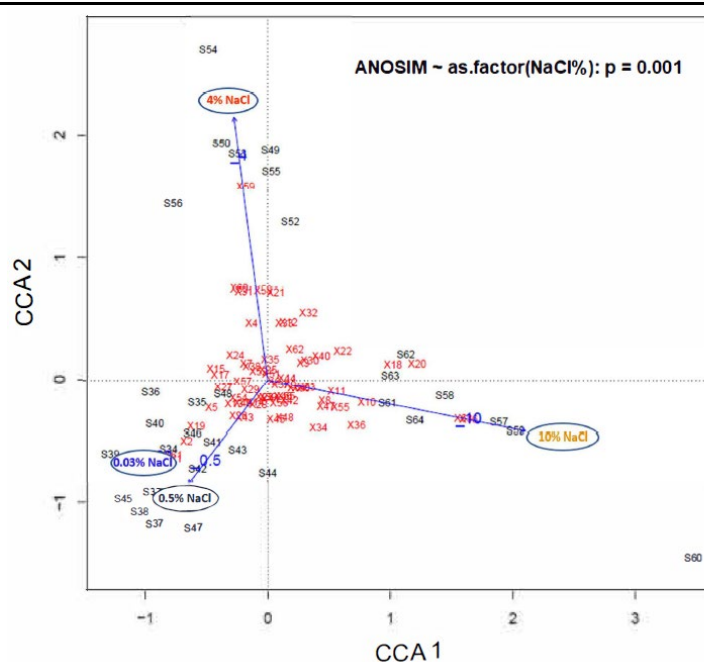

**Figure S4.** PCoA of unweighted and weighted UniFrac distances (upper and middle). PCoA results calculated with unweighted UniFrac distances depicting the beta diversity of gut microbiota among mice fed on sodium-deficient 0.03% NaCl, 0.5% NaCl (control), high salt 4% NaCl (HSD) and high salt 10% NaCl (HSD). Conditional correspondence analysis constrained by %NaCl content (bottom), the analysis of similarity was performed by the anosim function from “vegan” package of R,  $p$  value = 0.001.

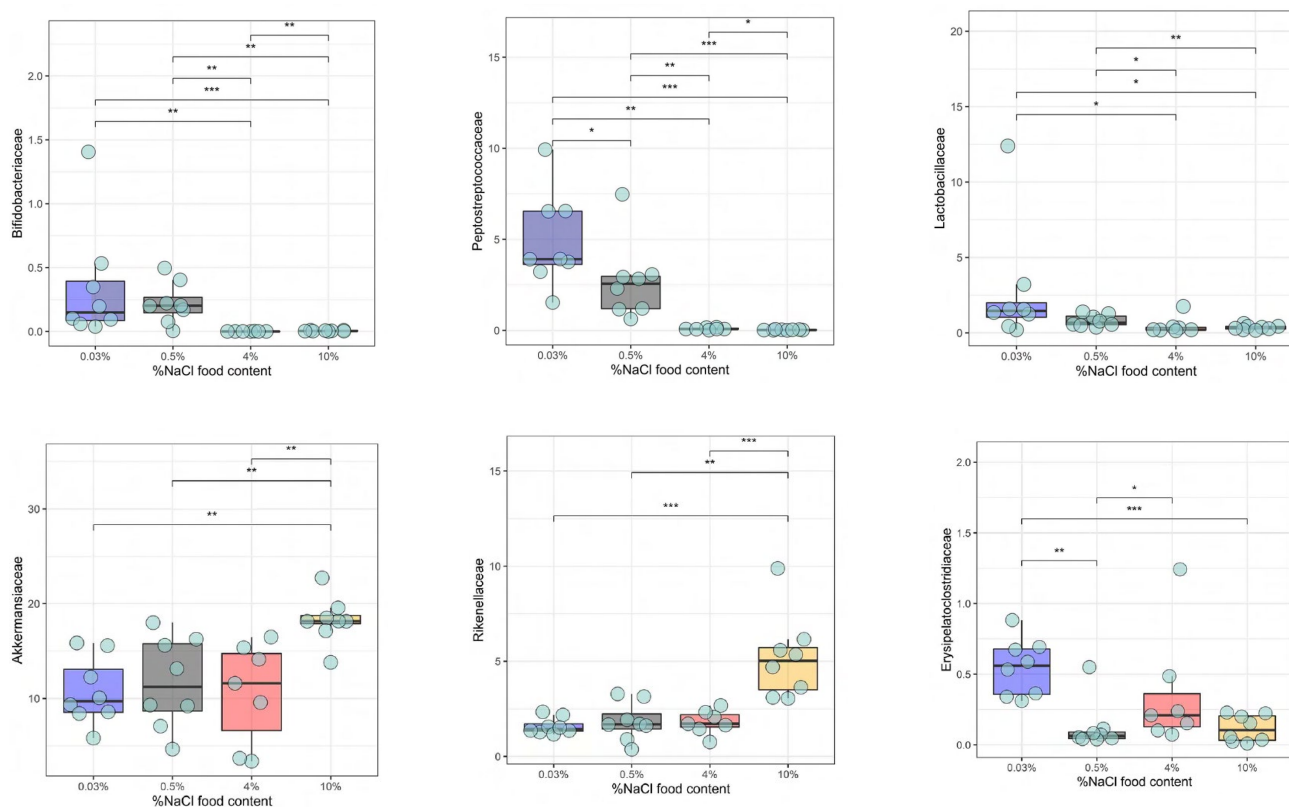

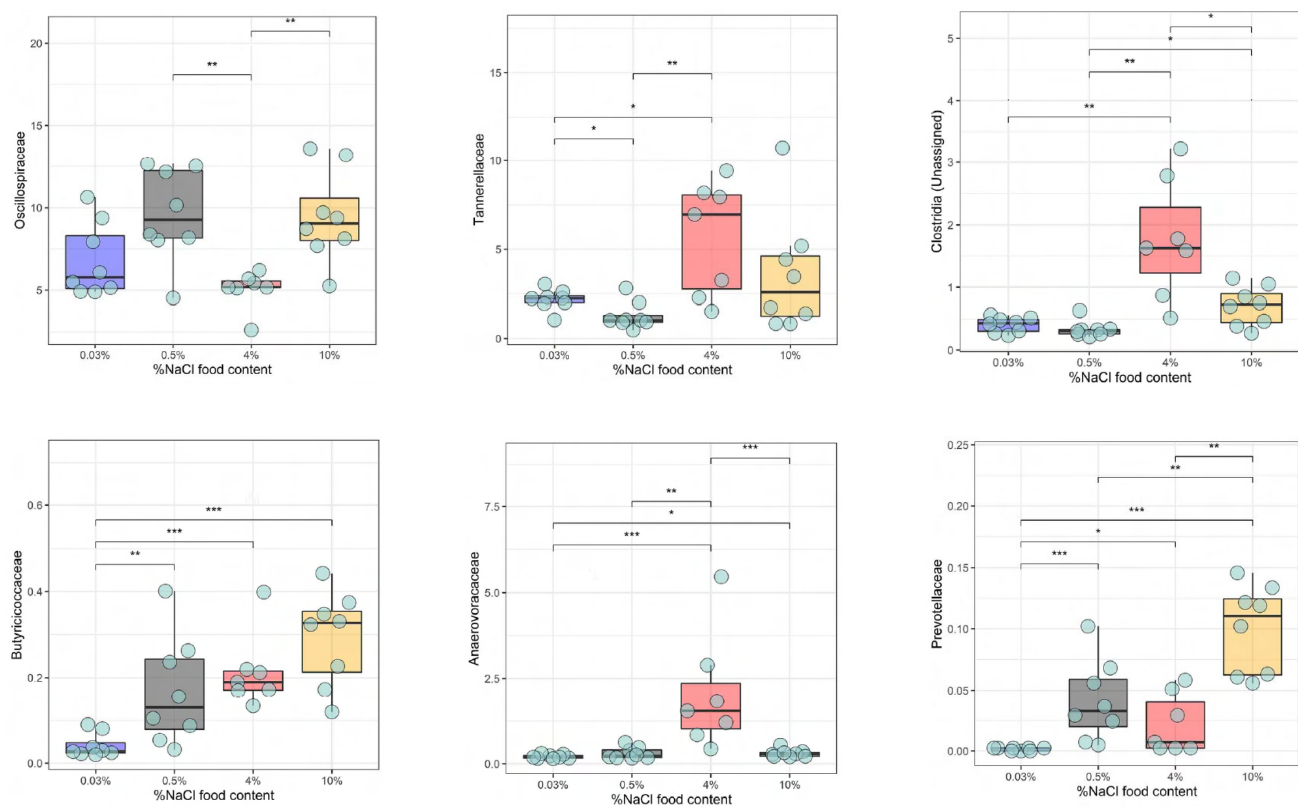

**Figure S5.** Bacterial families differentially represented in feces of mice fed on sodium-deficient 0.03% NaCl, 0.5% NaCl (control), high salt 4% NaCl (HSD) and high salt 10% NaCl (HSD). \*  $p \leq 0.05$ ; \*\*  $p \leq 0.01$ ; \*\*\*  $p \leq 0.001$ .

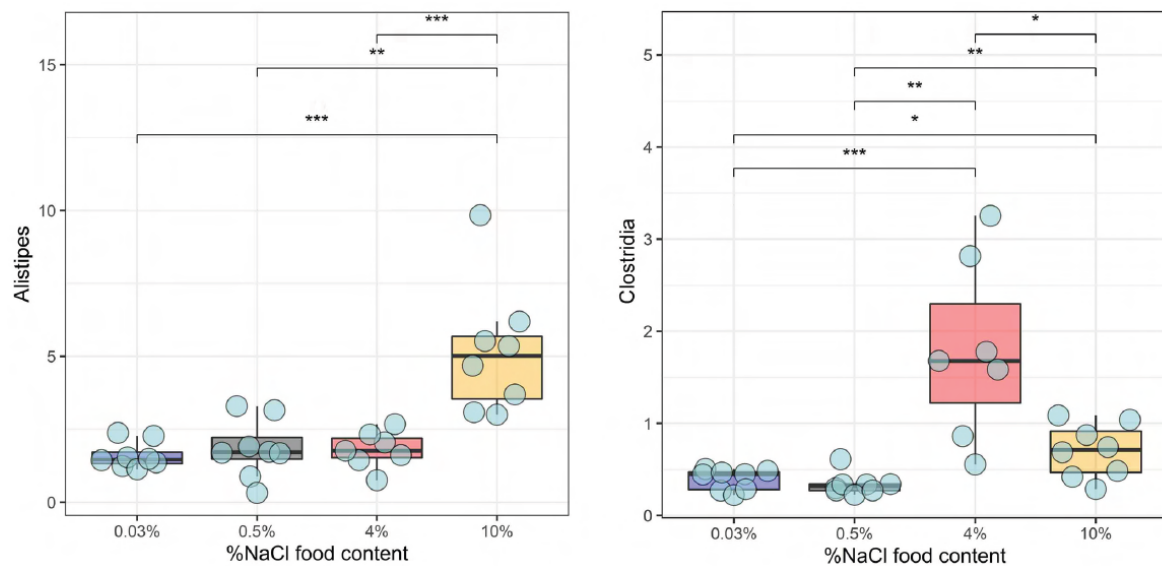

**Figure S6.** Bacterial genera differentially represented in feces of mice fed on sodium-deficient 0.03% NaCl, 0.5% NaCl (control), high salt 4% NaCl (HSD) and high salt 10% NaCl (HSD). \*  $p \leq 0.05$ ; \*\*  $p \leq 0.01$ ; \*\*\*  $p \leq 0.001$ .
